# Supplementary material
Source: PubMed Central journal article supplement (PMC2636914)

## Supplemental data.

**Figure S1. Recombinant WT and C3,5S Lck<sub>NT</sub> are myristoylated.** *E. coli* BL21(DE3) were transformed with pML1008 (WT Lck<sub>NT</sub>-His<sub>6</sub>), pML1175 (C3,5S Lck<sub>NT</sub>-His<sub>6</sub>), or empty pET21 vector with or without pML1067 (human *NMT1*). Cultures were grown at 37°C to OD<sub>600</sub> = 0.7-0.8 and induced with 0.3 mM IPTG for 100 min at 30°C. A portion of the culture (1 mL) was incubated with 1.7 nmol [<sup>3</sup>H]myristic acid (50μCi, PerkinElmer Life Sciences) for 4 hr at 30°C. Cells were collected by centrifugation and washed in cold PBS. Whole cell lysates were made by addition of 200 μL 1.5X sample buffer with 30 mM DTT and heating to 95°C for 4 min with vortexing. Samples were frozen overnight at -20°C. The next day thawed samples were spun at 10,000g for 2 min and 3 μL of each were separated by SDS-PAGE and processed for fluorography or immunoblotting with α-Lck (1:5000). The dried gel was exposed to film at -80°C for 16 hr. The bands present in lanes 2 and 3 indicate that both WT and C3,5S Lck<sub>NT</sub> are being myristoylated in *E. coli*.

Supplemental Figure

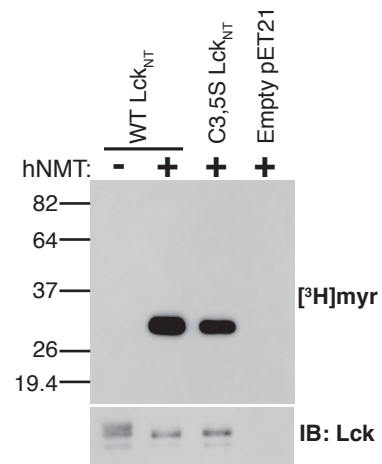

Supplement: M800270-JLR200_1.pdf [file M800270-JLR200_1.pdf]
